# Supplementary material for: Novel Reversible Inhibitors of Xanthine Oxidase Targeting the Active Site of the Enzyme
Source: MDPI journal article supplement (doi:10.3390/antiox12040825), 2023-03-28
Supplement: s1 [file s1]

# Supplementary Materials

## Novel reversible inhibitors of xanthine oxidase targeting the active site of the enzyme

**Rosario Rullo<sup>1,2,†</sup>, Carmen Cerchia<sup>3,†</sup>, Rosarita Nasso<sup>4</sup>, Virgilio Romanelli<sup>3</sup>, Emmanuele De Vendittis<sup>2</sup>, Mariorosario Masullo<sup>4,\*</sup> and Antonio Lavecchia<sup>3,\*</sup>**

<sup>1</sup> Institute for the Animal Production Systems in the Mediterranean Environment, CNR, 80055 Portici (NA), Italy; [rosario.rullo@cnr.it](mailto:rosario.rullo@cnr.it) (R.R.)

<sup>2</sup> Department of Molecular Medicine and Medical Biotechnology, University of Naples Federico II, 80131 Naples, Italy; [devendit@unina.it](mailto:devendit@unina.it) (E.D.V.)

<sup>3</sup> Department of Pharmacy, "Drug Discovery" Laboratory, University of Naples Federico II, 80131 Naples, Italy; [carmen.cerchia@unina.it](mailto:carmen.cerchia@unina.it) (C.C.); [virgilio.romanelli@unina.it](mailto:virgilio.romanelli@unina.it) (V.R.); [antonio.lavecchia@unina.it](mailto:antonio.lavecchia@unina.it) (A.L.)

<sup>4</sup> Department of Human Movement Sciences and Wellness, University of Naples "Parthenope", 80133 Naples, Italy; [rosaritanasso@gmail.com](mailto:rosaritanasso@gmail.com) (R.N.); [mario.masullo@uniparthenope.it](mailto:mario.masullo@uniparthenope.it) (M.M.)

\* Correspondence: [antonio.lavecchia@unina.it](mailto:antonio.lavecchia@unina.it); Phone: +39-081-678613/623 (A.L.); [mario.masullo@uniparthenope.it](mailto:mario.masullo@uniparthenope.it); Phone +39-081-5474676 (M.M.).

† R.R. and C.C. equally contributed to this paper.

Table S1. Compounds ALS-1→36 identified by virtual screening [46].

| N. | Approach | ID     | Structure                                                                            |
|----|----------|--------|--------------------------------------------------------------------------------------|
| 1  | LBVS     | ALS-1  | 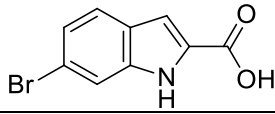   |
| 2  | LBVS     | ALS-2  |    |
| 3  | LBVS     | ALS-3  |    |
| 4  | LBVS     | ALS-4  |    |
| 5  | LBVS     | ALS-5  |    |
| 6  | LBVS     | ALS-6  |   |
| 7  | LBVS     | ALS-7  |  |
| 8  | LBVS     | ALS-8  |  |
| 9  | LBVS     | ALS-9  |  |
| 10 | LBVS     | ALS-10 |  |

|    |      |        |                                                                                      |
|----|------|--------|--------------------------------------------------------------------------------------|
| 11 | LBVS | ALS-11 | 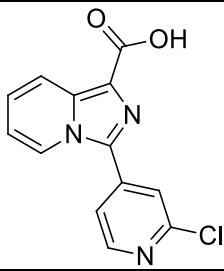   |
| 12 | LBVS | ALS-12 |    |
| 13 | LBVS | ALS-13 |    |
| 14 | LBVS | ALS-14 |   |
| 15 | LBVS | ALS-15 |  |
| 16 | LBVS | ALS-16 |  |
| 17 | LBVS | ALS-17 |  |
| 18 | SBVS | ALS-18 |  |
| 19 | LBVS | ALS-19 |  |

|    |      |        |                                                                                      |
|----|------|--------|--------------------------------------------------------------------------------------|
| 20 | LBVS | ALS-20 | 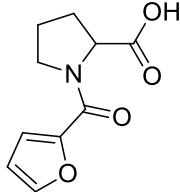   |
| 21 | SBVS | ALS-21 |    |
| 22 | LBVS | ALS-22 |    |
| 23 | LBVS | ALS-23 |   |
| 24 | LBVS | ALS-24 |  |
| 25 | LBVS | ALS-25 |  |
| 26 | LBVS | ALS-26 |  |
| 27 | LBVS | ALS-27 |  |
| 28 | LBVS | ALS-28 |  |

|    |      |        |                                                                                      |
|----|------|--------|--------------------------------------------------------------------------------------|
| 29 | SBVS | ALS-29 | 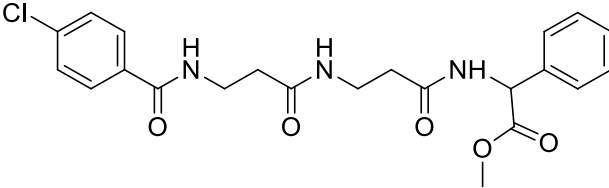   |
| 30 | SBVS | ALS-30 |    |
| 31 | SBVS | ALS-31 |   |
| 32 | SBVS | ALS-32 |  |
| 33 | SBVS | ALS-33 |  |
| 34 | SBVS | ALS-34 |  |
| 35 | SBVS | ALS-35 |  |

|    |      |        |                                                                                                                                                                                                                                                                                                                                                                                                                                                                                                                          |
|----|------|--------|--------------------------------------------------------------------------------------------------------------------------------------------------------------------------------------------------------------------------------------------------------------------------------------------------------------------------------------------------------------------------------------------------------------------------------------------------------------------------------------------------------------------------|
| 36 | SBVS | ALS-36 | 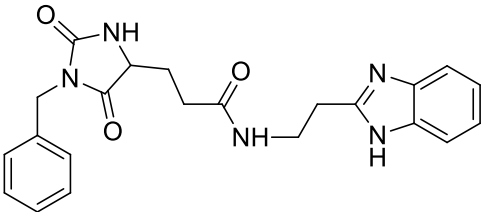 <p>The chemical structure of ALS-36 is a complex molecule featuring a benzimidazole moiety linked via a methylene group to a secondary amide. This amide is connected to a 1-phenyl-1H-imidazole-2-carboxamide derivative through a three-carbon chain. The structure includes a benzimidazole ring system, a methylene bridge, a secondary amide group, a three-carbon linker, and a 1-phenyl-1H-imidazole-2-carboxamide moiety.</p> |
|----|------|--------|--------------------------------------------------------------------------------------------------------------------------------------------------------------------------------------------------------------------------------------------------------------------------------------------------------------------------------------------------------------------------------------------------------------------------------------------------------------------------------------------------------------------------|
